# Supplementary material for: Proposal of a Two-Tier System in Grouping Adenocarcinoma of the Uterine Cervix
Source: MDPI journal article supplement (doi:10.3390/cancers12051251), 2020-05-15
Supplement: s1 [file s1]

# Supplementary Materials: Proposal of a Two-Tier System in Grouping Adenocarcinoma of the Uterine Cervix

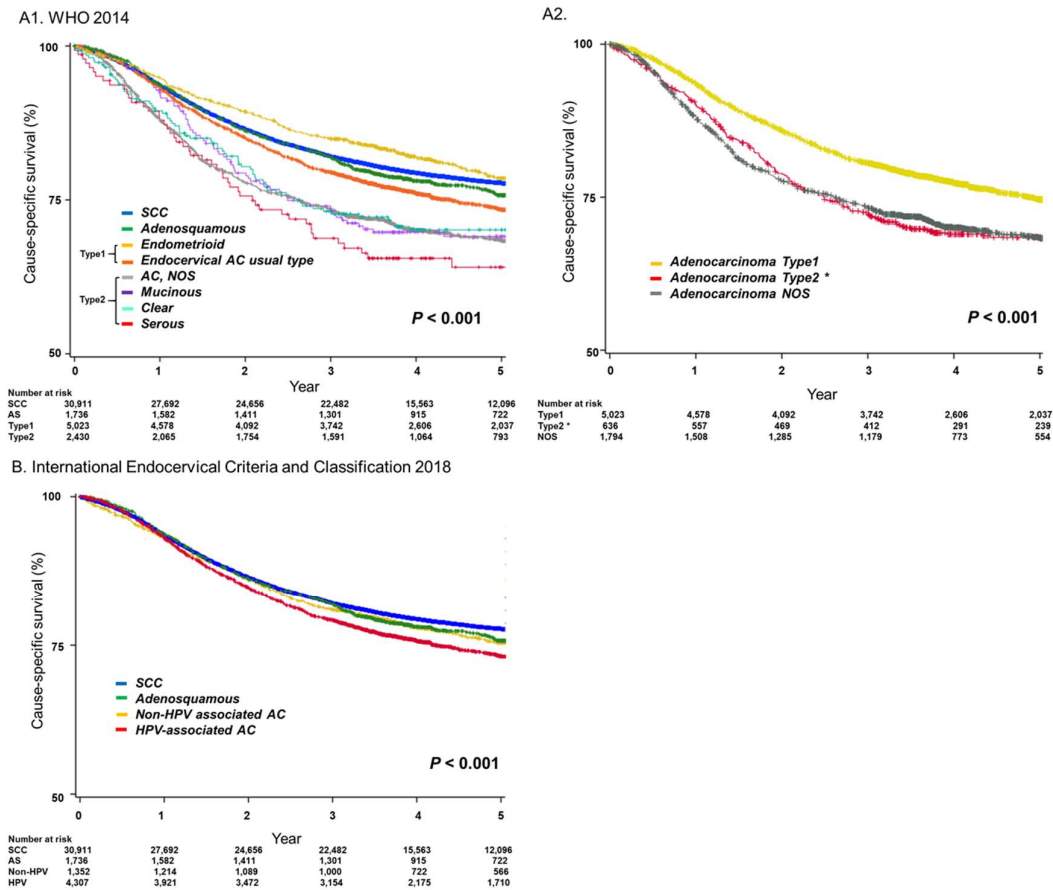

**Figure S1.** Cause-specific survival for adenocarcinoma subtypes based on the WHO/IECC classification. Log-rank test for  $p$ -value. The Y-axis was truncated to 50–100%. Survival curves were constructed for cause-specific survival of women with histological subtypes based on the WHO 2014 classification (panel **A1**) and the IECC 2018 classification (panel **B**). Among cervical adenocarcinomas based on WHO 2014 classification, validation of survival analysis was performed (panel **A2**). \* Abbreviations: WHO, World Health Organization; IECC, International Endocervical Criteria and Classification; HPV, human papillomavirus; SCC, squamous cell carcinoma; AC, adenocarcinoma; AS, adenosquamous; and NOS, not otherwise specified.

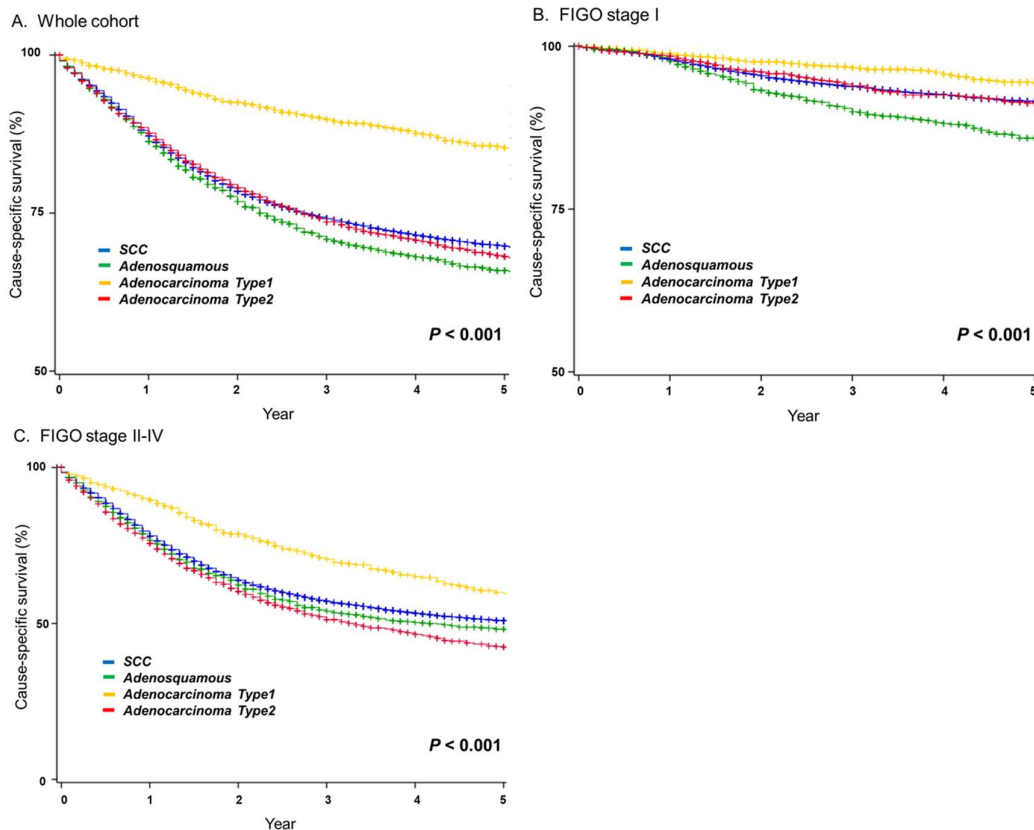

**Figure S2.** Cause-specific survival for histological subtypes (SEER cohort). Log-rank test for  $P$ -value. The Y-axis was truncated to 50%–100% for panel A–B and 0–100% for panel C. Survival curves were constructed for the cause-specific survival of women with whole cohort (panel A), women with stage I (panel B), and women with stage II–IV (panel C).

**Table S1.** Classification of cervical adenocarcinoma.

| WHO 2014                  | IECC 2018                 |                        |
|---------------------------|---------------------------|------------------------|
|                           | HPV-Associated            | Non-HPV-Associated     |
| Endocervical usual type   | Endocervical usual type   |                        |
| Mucinous, NOS             | Mucinous, NOS             |                        |
| Mucinous, gastric type    |                           | Mucinous, gastric type |
| Mucinous, intestinal type | Mucinous, intestinal type |                        |
| Endometrioid              |                           | Endometrioid           |
| Clear cell                |                           | Clear cell             |
| Serous                    |                           | Serous                 |

Adenocarcinoma classification by the WHO was compared to that by the IECC. Abbreviations: WHO, World Health Organization; IECC, International Endocervical Criteria and Classification; HPV, human papillomavirus; and NOS, not otherwise specified.

**Table S2.** Patient demographics of cervical adenocarcinomas.

| Characteristics         | AC Type 1             | AC Type 2                           |                       | <i>p</i> -value  |
|-------------------------|-----------------------|-------------------------------------|-----------------------|------------------|
|                         |                       | mucinous, serous,<br>and clear cell | Adenocarcinoma<br>NOS |                  |
| <b>Number</b>           | <b>10,121 (66.2%)</b> | <b>1,471 (9.6%)</b>                 | <b>3,686 (24.2%)</b>  |                  |
| Age (years)             | 49 (40–60)            | 54 (43–65)                          | 53 (41–65)            | <b>&lt;0.001</b> |
| <40                     | 2,326 (23.0%)         | 227 (15.4%)                         | 746 (20.2%)           |                  |
| 40–49                   | 2,971 (29.4%)         | 372 (25.3%)                         | 949 (25.7%)           |                  |
| 50–59                   | 2,282 (22.5%)         | 303 (20.6%)                         | 728 (19.8%)           |                  |
| 60–69                   | 1,517 (15.0%)         | 320 (21.8%)                         | 614 (16.7%)           |                  |
| ≥70                     | 1,025 (10.1%)         | 249 (16.8%)                         | 649 (17.6%)           |                  |
| Registry area           |                       |                                     |                       | <b>&lt;0.001</b> |
| North                   | 6,61 (6.5%)           | 144 (9.8%)                          | 240 (6.5%)            |                  |
| Central                 | 1,615 (16.0%)         | 220 (15.0%)                         | 584 (15.8%)           |                  |
| East                    | 3,784 (37.4%)         | 487 (33.1%)                         | 1,414 (38.4%)         |                  |
| West                    | 4,061 (40.1%)         | 620 (42.1%)                         | 1,448 (39.3%)         |                  |
| Year at diagnosis       |                       |                                     |                       | <b>&lt;0.001</b> |
| 2001–2005               | 2,635 (26.0%)         | 348 (23.7%)                         | 801 (21.7%)           |                  |
| 2006–2010               | 3,322 (32.8%)         | 415 (28.2%)                         | 1,214 (32.9%)         |                  |
| 2011–2015               | 4,164 (41.1%)         | 708 (48.1%)                         | 1,671 (45.3%)         |                  |
| FIGO stage              |                       |                                     |                       | <b>&lt;0.001</b> |
| I                       | 6,989 (69.1%)         | 924 (62.8%)                         | 2,028 (55.0%)         |                  |
| II                      | 1,968 (19.4%)         | 276 (18.8%)                         | 650 (17.6%)           |                  |
| III                     | 559 (5.5%)            | 116 (7.9%)                          | 440 (11.9%)           |                  |
| IV                      | 605 (6.0%)            | 155 (10.5%)                         | 568 (15.4%)           |                  |
| Histology               |                       |                                     |                       | n.a.             |
| Endocervical usual type | 8,194 (81.0%)         | 0                                   | 0                     |                  |
| Endometrioid            | 1,927 (19.0%)         | 0                                   | 0                     |                  |
| Mucinous                | 0                     | 617 (41.4%)                         | 0                     |                  |
| Serous                  | 0                     | 311 (20.8%)                         | 0                     |                  |
| Clear                   | 0                     | 543 (36.4%)                         | 0                     |                  |
| Adenocarcinoma, NOS     | 0                     | 0                                   | 3,686 (100%)          |                  |
| Initial treatment       |                       |                                     |                       | <b>&lt;0.001</b> |
| Surgery                 | 8,637 (85.3%)         | 1,183 (80.4%)                       | 2,329 (63.2%)         |                  |
| CCRT                    | 797 (7.9%)            | 131 (8.9%)                          | 626 (17.0%)           |                  |
| RT only                 | 446 (4.4%)            | 94 (6.3%)                           | 368 (10.0%)           |                  |
| Chemotherapy only       | 200 (2.0%)            | 61 (4.1%)                           | 338 (9.2%)            |                  |
| Others                  | 41 (0.4%)             | 2 (0.1%)                            | 25 (0.7%)             |                  |

The number (%) or median (interquartile range) is shown. Abbreviations: FIGO, International Federation of Gynecology and Obstetrics; AC, adenocarcinoma; NOS, not otherwise specified; CCRT, concurrent chemoradiation; RT, radiotherapy; and n.a., not available.

**Table S3.** Independent contributing factors for type 2 adenocarcinoma (N = 83,218).

| Characteristic       | Whole Cohort<br>Number (%) | Adenocarcinoma<br>Type 2 | Adjusted OR<br>(95% CI) | <i>p</i> -value  |
|----------------------|----------------------------|--------------------------|-------------------------|------------------|
| Age (years)          |                            |                          |                         |                  |
| <40                  | 19,333 (23.2%)             | 973 (18.9%)              | 0.71 (0.65-0.78)        | <b>&lt;0.001</b> |
| 40–49                | 19,722 (23.7%)             | 1,321 (25.6%)            | 0.98 (0.90-1.07)        | 0.67             |
| 50–59                | 16,123 (19.4%)             | 1,031 (20.0%)            | 1                       |                  |
| 60–69                | 14,196 (17.1%)             | 934 (18.1%)              | 1.07 (0.97-1.17)        | 0.18             |
| ≥70                  | 13,844 (16.6%)             | 898 (17.4%)              | 1.32 (1.19-1.45)        | <b>&lt;0.001</b> |
| Registry area        |                            |                          |                         |                  |
| North                | 5,655 (6.8%)               | 384 (7.4%)               | 1.04 (0.93–1.16)        | 0.53             |
| Central              | 12,371 (14.9%)             | 804 (15.6%)              | 0.99 (0.91–1.09)        | 0.92             |
| East                 | 29,751 (35.8%)             | 1,901 (36.9%)            | 1                       |                  |
| West                 | 35,441 (42.6%)             | 2,068 (40.1%)            | 0.89 (0.83–0.95)        | <b>&lt;0.001</b> |
| Year at diagnosis    |                            |                          |                         |                  |
| 2001–2005            | 22,370 (26.9%)             | 1,149 (22.3%)            | 1                       |                  |
| 2006–2010            | 26,868 (32.3%)             | 1,629 (31.6%)            | 1.21 (1.12–1.30)        | <b>&lt;0.001</b> |
| 2011–2015            | 33,980 (40.8%)             | 2,379 (46.1%)            | 1.36 (1.26–1.46)        | <b>&lt;0.001</b> |
| FIGO stage           |                            |                          |                         |                  |
| I                    | 45,624 (54.8%)             | 2,952 (57.2%)            | 1                       |                  |
| II                   | 19,410 (23.3%)             | 926 (18.0%)              | 0.81 (0.74–0.87)        | <b>&lt;0.001</b> |
| III                  | 10,680 (12.8%)             | 556 (10.8%)              | 1.15 (1.02–1.30)        | <b>0.03</b>      |
| IV                   | 7,504 (9.1%)               | 723 (14.0%)              | 1.88 (1.67–2.11)        | <b>&lt;0.001</b> |
| Initial treatment    |                            |                          |                         |                  |
| Surgery              | 53,354 (64.1%)             | 3,512 (68.1%)            | 2.11 (1.89–2.36)        | <b>&lt;0.001</b> |
| CCRT                 | 16,318 (19.6%)             | 758 (14.7%)              | 1                       |                  |
| RT only              | 11,541 (13.9%)             | 434 (8.4%)               | 1.09 (0.96–1.24)        | 0.17             |
| Chemotherapy<br>only | 1,355 (1.6%)               | 246 (8.3%)               | 2.33 (2.04–2.66)        | <b>&lt;0.001</b> |
| Others               | 470 (0.6%)                 | 27 (0.5%)                | 1.34 (0.90–1.99)        | 0.15             |

Number (%) is shown. Percentages are shown per column. A binary logistic regression model was used for multivariate analysis (all significant covariates in the univariate analysis were entered in final model). Significant *P*-values are emboldened. Abbreviations: FIGO, International Federation of Gynecology and Obstetrics; CCRT, concurrent chemoradiation; RT, radiotherapy; No., number; OR, odds ratio; and CI, confidence interval.

**Table S4.** Independent contributing factors for type 2 adenocarcinoma among whole adenocarcinoma cohort (N = 15,278).

| Characteristic    | Whole AC Cohort<br>Number (%) | Adenocarcinoma<br>Type 2 | Adjusted OR<br>(95% CI) | <i>p</i> -value  |
|-------------------|-------------------------------|--------------------------|-------------------------|------------------|
| Age (years)       |                               |                          |                         |                  |
| <40               | 3,299 (21.6%)                 | 973 (18.9%)              | 1.01 (0.91-1.12)        | 0.85             |
| 40–49             | 4,292 (28.1%)                 | 1,321 (25.6%)            | 0.93 (0.83-1.03)        | 0.18             |
| 50–59             | 3,313 (21.7%)                 | 1,031 (20.0%)            | 1                       |                  |
| 60–69             | 2,451 (16.0%)                 | 934 (18.1%)              | 1.17 (1.04-1.31)        | <b>0.008</b>     |
| ≥70               | 1,923 (12.6%)                 | 898 (17.4%)              | 1.32 (1.16-1.50)        | <b>&lt;0.001</b> |
| Registry area     |                               |                          |                         |                  |
| North             | 1,045 (6.8%)                  | 384 (7.4%)               | 1.20 (1.04-1.38)        | <b>0.012</b>     |
| Central           | 2,419 (15.8%)                 | 804 (15.6%)              | 0.99 (0.90-1.10)        | 0.89             |
| East              | 5,685 (37.2%)                 | 1,901 (36.9%)            | 1                       |                  |
| West              | 6,129 (40.1%)                 | 2,068 (40.1%)            | 1.04 (0.96-1.13)        | 0.32             |
| Year at diagnosis |                               |                          |                         |                  |
| 2001–2005         | 3,784 (24.8%)                 | 1,149 (22.3%)            | 1                       |                  |
| 2006–2010         | 4,951 (32.4%)                 | 1,629 (31.6%)            | 1.10 (1.01-1.21)        | <b>0.038</b>     |
| 2011–2015         | 6,543 (42.8%)                 | 2,379 (46.1%)            | 1.25 (1.14-1.37)        | <b>&lt;0.001</b> |
| FIGO stage        |                               |                          |                         |                  |
| I                 | 9,941 (65.1%)                 | 2,952 (57.2%)            | 1                       |                  |
| II                | 2,894 (18.9%)                 | 926 (18.0%)              | 0.89 (0.81-0.98)        | <b>0.02</b>      |
| III               | 1,115 (7.3%)                  | 556 (10.8%)              | 1.24 (1.06-1.46)        | <b>0.007</b>     |
| IV                | 1,328 (8.7%)                  | 723 (14.0%)              | 1.54 (1.32-1.78)        | <b>&lt;0.001</b> |
| Initial treatment |                               |                          |                         |                  |
| Surgery           | 12,148 (79.5%)                | 3,512 (68.1%)            | 1                       |                  |
| CCRT              | 1,447 (9.5%)                  | 758 (14.7%)              | 2.10 (1.83-2.42)        | <b>&lt;0.001</b> |
| RT only           | 817 (5.3%)                    | 434 (8.4%)               | 2.16 (1.83-2.55)        | <b>&lt;0.001</b> |
| Chemotherapy only | 798 (5.2%)                    | 246 (8.3%)               | 2.04 (1.71-2.44)        | <b>&lt;0.001</b> |
| Others            | 68 (0.4%)                     | 27 (0.5%)                | 1.26 (0.76-2.07)        | 0.37             |

Number (%) is shown. Percentages are shown per column. A binary logistic regression model was used for multivariate analysis (all significant covariates were entered in final model). Significant *P*-values are emboldened. Abbreviations: FIGO, International Federation of Gynecology and Obstetrics; CCRT, concurrent chemoradiation; RT, radiotherapy; No., number; OR, odds ratio; and CI, confidence interval.

**Table S5.** Clinicopathological characteristics of cervical cancer (SEER cohort).

| Characteristics            | SCC            | AC Type 1     | AC Type 2     | AS            | p-value |
|----------------------------|----------------|---------------|---------------|---------------|---------|
| Number                     | 34,223 (85.3%) | 2,160 (5.4%)  | 1,658 (4.1%)  | 1,925 (4.8%)  |         |
| Age (years)                | 49 (39–61)     | 46 (38–56)    | 50 (40–63)    | 46 (38–57)    | <0.001  |
| <40                        | 8,862 (25.9%)  | 617 (28.6%)   | 366 (22.1%)   | 565 (29.4%)   |         |
| 40–49                      | 8,845 (25.8%)  | 676 (31.3%)   | 419 (25.3%)   | 569 (29.6%)   |         |
| 50–59                      | 7,254 (21.2%)  | 457 (21.2%)   | 340 (20.5%)   | 381 (19.8%)   |         |
| 60–69                      | 4,845 (14.2%)  | 253 (11.7%)   | 247 (14.9%)   | 234 (12.2%)   |         |
| ≥70                        | 4,417 (12.9%)  | 157 (7.3%)    | 286 (17.2%)   | 176 (9.1%)    |         |
| Race/ethnicity             |                |               |               |               | <0.001  |
| White                      | 17,502 (51.1%) | 1,414 (65.5%) | 1,020 (61.5%) | 1,008 (52.4%) |         |
| Black                      | 5,548 (16.2%)  | 130 (6.0%)    | 140 (8.4%)    | 220 (11.4%)   |         |
| Hispanic                   | 7,555 (22.1%)  | 392 (18.1%)   | 287 (17.3%)   | 461 (23.9%)   |         |
| Asian                      | 2,662 (7.8%)   | 165 (7.6%)    | 171 (10.3%)   | 190 (9.9%)    |         |
| Others                     | 956 (2.8%)     | 59 (2.7%)     | 40 (2.4%)     | 46 (2.4%)     |         |
| Registry area              |                |               |               |               | <0.001  |
| Central                    | 7,254 (21.2%)  | 410 (19.0%)   | 295 (17.8%)   | 316 (16.4%)   |         |
| East                       | 9,388 (27.4%)  | 560 (25.9%)   | 454 (27.4%)   | 474 (24.6%)   |         |
| West                       | 17,581 (51.4%) | 1,190 (55.1%) | 909 (54.8%)   | 1,135 (59.0%) |         |
| Year at diagnosis          |                |               |               |               | <0.001  |
| 2001–2005                  | 12,098 (35.4%) | 578 (26.8%)   | 539 (32.5%)   | 736 (38.2%)   |         |
| 2006–2010                  | 11,361 (33.2%) | 708 (32.8%)   | 551 (33.2%)   | 649 (33.7%)   |         |
| 2011–2015                  | 10,764 (31.5%) | 874 (40.5%)   | 568 (34.3%)   | 540 (28.1%)   |         |
| AJCC 7 <sup>th</sup> stage |                |               |               |               | <0.001  |
| I                          | 15,454 (46.6%) | 1,552 (73.6%) | 804 (48.5%)   | 894 (47.6%)   |         |
| II                         | 5,508 (16.6%)  | 185 (8.8%)    | 223 (13.4%)   | 261 (13.9%)   |         |
| III                        | 7,789 (23.5%)  | 229 (10.9%)   | 323 (19.5%)   | 429 (22.8%)   |         |
| IV                         | 4,401 (13.3%)  | 142 (6.7%)    | 266 (16.0%)   | 294 (15.7%)   |         |
| Squamous cell              | 34,223 (100%)  | 0             | 0             | 0             | n.a.    |
| Adenosquamous              | 0              | 0             | 0             | 1,925 (100%)  |         |
| Adenocarcinoma             |                |               |               |               |         |
| Endocervical usual type    | 0              | 12,58 (58.2%) | 0             | 0             |         |
| Endometrioid               | 0              | 902 (41.8%)   | 0             | 0             |         |
| Mucinous                   | 0              | 0             | 875 (52.8%)   | 0             |         |
| Serous                     | 0              | 0             | 352 (21.2%)   | 0             |         |
| Clear                      | 0              | 0             | 431 (26.0%)   | 0             |         |
| Initial treatment          |                |               |               |               | <0.001  |
| Surgery                    | 17,967 (52.5%) | 1,813 (83.9%) | 1,179 (71.1%) | 12,94 (67.2%) |         |
| CCRT                       | 10,876 (31.8%) | 185 (8.6%)    | 274 (16.5%)   | 424 (22.0%)   |         |
| RT only                    | 2,398 (7.0%)   | 51 (2.4%)     | 67 (4.0%)     | 84 (4.4%)     |         |
| Chemotherapy only          | 616 (1.8%)     | 17 (0.8%)     | 34 (2.1%)     | 38 (2.0%)     |         |
| Others                     | 2,366 (6.9%)   | 94 (4.4%)     | 104 (6.3%)    | 85 (4.4%)     |         |

The number (%) or median (interquartile range) is shown. Abbreviations: SEER, Surveillance, Epidemiology, and End Results program; and CCRT, concurrent chemoradiation; n.a, not available.
